# Supplementary material for: miR-16-5p, miR-21-5p, and miR-155-5p in circulating vesicles as psoriasis biomarkers
Source: Springer Nature journal article supplement (doi:10.1038/s41598-025-91532-9), 2025-02-26
Supplement: MOESM2 [file 41598_2025_91532_MOESM2_ESM.pdf]

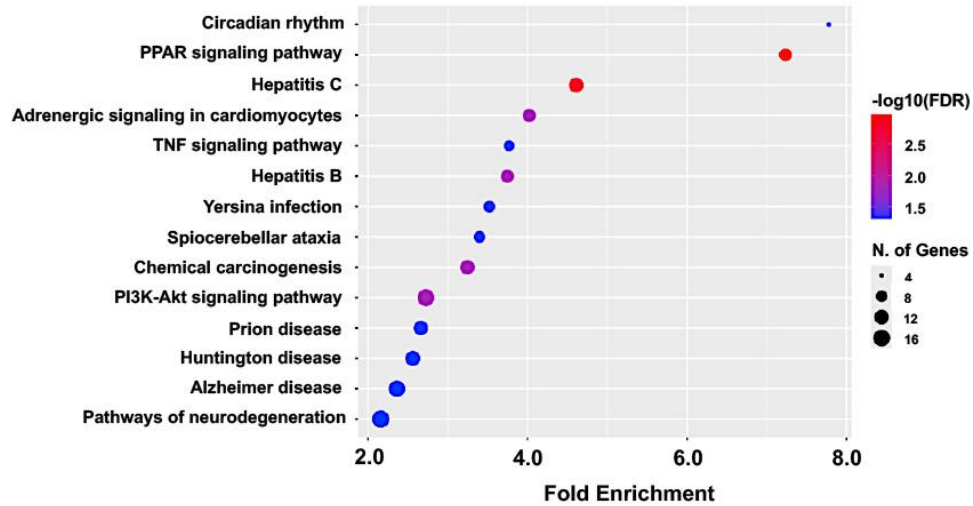

**Supplementary figure 1. Pathway enrichment analysis of differentially expressed genes.** The x-axis represents fold enrichment, while the y-axis lists the significantly enriched pathways. Red dot color represents higher significance. Dot size corresponds to the number of genes involved in each pathway.
